# Supplementary material for: Heat and moisture exchangers (HMEs) and heated humidifiers (HHs) in adult critically ill patients: a systematic review, meta-analysis and meta-regression of randomized controlled trials
Source: PubMed Central journal article supplement (PMC5447307; doi:10.1186/s13054-017-1710-5), 2017-05-29

# Artificial airway occlusion

| Studies        | Estimate (95% C.I.)          | HME hydrophobic | HH           |
|----------------|------------------------------|-----------------|--------------|
| Martin 1990    | 17.469 (1.021, 298.935)      | 6/31            | 0/42         |
| Misset 1991    | 1.733 (0.345, 8.707)         | 4/30            | 2/26         |
| Roustan 1992   | 21.036 (1.253, 353.184)      | 9/55            | 0/61         |
| Villafane 1996 | 3.187 (0.368, 27.577)        | 3/16            | 1/17         |
| Kirton 1997    | 0.143 (0.007, 2.740)         | 0/140           | 3/140        |
| <b>Overall</b> | <b>2.990 (0.671, 13.327)</b> | <b>22/272</b>   | <b>6/286</b> |

Tau<sup>2</sup>=1.385; Q (df=4)=7.810; I<sup>2</sup>=48%; p=0.099  
 Test overall effect Z=3.234; p=0.151

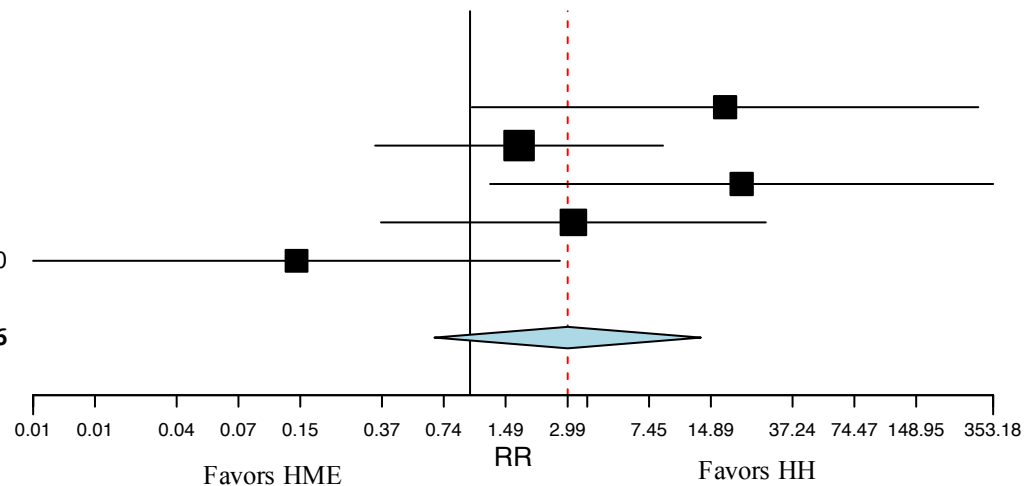

Weight:  
 Martin: 16.7%, Misset: 28.2%, Roustan:16.8%, Villafane:22.4% Kirton: 15.9%

| Studies         | Estimate (95% C.I.)         | HME hydroscopic | HH            |
|-----------------|-----------------------------|-----------------|---------------|
| Kirkegaard 1987 | 5.000 (0.260, 96.127)       | 2/15            | 0/15          |
| Daud 1991       | 0.645 (0.330, 1.258)        | 9/29            | 13/27         |
| Dreyfuss 1995   | 3.435 (0.143, 82.813)       | 1/61            | 0/70          |
| Branson 1996    | 1.100 (0.022, 54.407)       | 0/49            | 0/54          |
| Boots 1997      | 0.977 (0.020, 48.099)       | 0/42            | 0/41          |
| Hurni 1997      | 0.317 (0.013, 7.615)        | 0/59            | 1/56          |
| Kollef 1998     | 0.902 (0.018, 45.194)       | 0/163           | 0/147         |
| Lucchetti 1998  | 13.562 (0.745, 246.762)     | 3/15            | 0/30          |
| Lacherade 2005  | 0.199 (0.023, 1.686)        | 1/185           | 5/184         |
| boots 2006      | 1.005 (0.020, 50.402)       | 0/190           | 0/191         |
| <b>Overall</b>  | <b>0.767 (0.436, 1.348)</b> | <b>16/808</b>   | <b>19/815</b> |

Tau<sup>2</sup>=0.000; Q (df=9)=78.325; I<sup>2</sup>=0%; p=0.502  
 Test overall effect Z=0.489; p=0.624

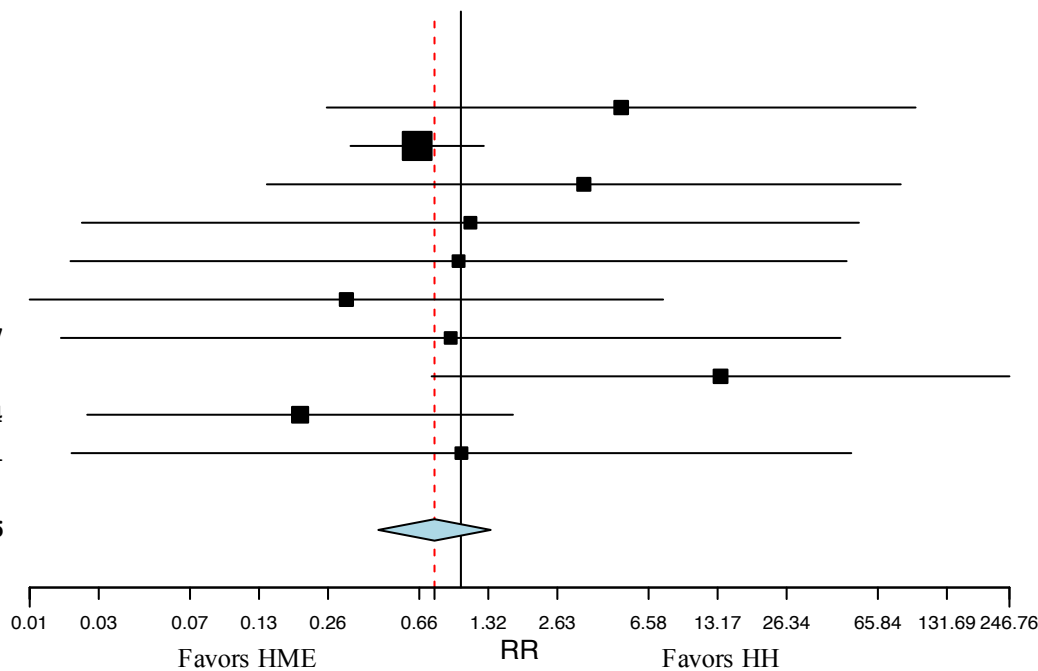

Weight:  
 Kirkegaard:3.6%, Daud:71%, Dreyfuss: 3.1%, Branson:2%, Boots:2%, Hurni: 3.1%, Lucchetti: 3.8%, Lacherade: 7%,boots: 2.1%

# Pneumonia

| Studies        | Estimate (95% C.I.)         | HME hydrophobic | HH            |
|----------------|-----------------------------|-----------------|---------------|
| Martin 1990    | 0.293 (0.058, 1.491)        | 2/31            | 8/42          |
| Roustan 1992   | 0.578 (0.181, 1.843)        | 5/55            | 9/61          |
| Kirton 1997    | 0.413 (0.188, 0.907)        | 10/140          | 22/140        |
| <b>Overall</b> | <b>0.431 (0.235, 0.790)</b> | <b>17/226</b>   | <b>39/243</b> |

Tau<sup>2</sup>=0.000; Q (df=2)=0.473 ; I<sup>2</sup>=0%; p=0.789  
 Test overall effect Z=2.529; p=0.011

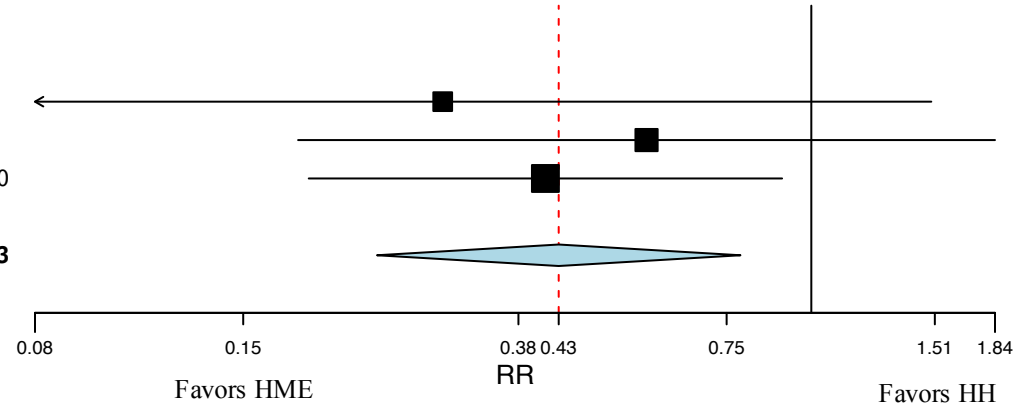

Weight:  
 Martin:13.8%,  
 Roustan:27.2%,  
 Kirton:59%

| Studies        | Estimate (95% C.I.)         | HME hydroscopic | HH             |
|----------------|-----------------------------|-----------------|----------------|
| Dreyfuss 1995  | 0.845 (0.276, 2.589)        | 6/61            | 8/70           |
| Branson 1996   | 1.109 (0.213, 5.768)        | 3/49            | 3/54           |
| boots 1997     | 0.810 (0.247, 2.653)        | 6/42            | 7/41           |
| Kollef 1998    | 0.892 (0.420, 1.894)        | 15/163          | 15/147         |
| Memish 2001    | 0.683 (0.325, 1.433)        | 14/123          | 19/120         |
| Diaz 2002      | 1.600 (0.424, 6.031)        | 8/23            | 5/20           |
| Lachede 2005   | 0.842 (0.532, 1.333)        | 47/185          | 53/184         |
| Lorente 2006   | 3.527 (1.386, 8.977)        | 21/53           | 8/51           |
| Boots 2006     | 1.230 (0.705, 2.147)        | 32/190          | 27/191         |
| <b>Overall</b> | <b>1.049 (0.776, 1.418)</b> | <b>152/889</b>  | <b>145/878</b> |

Tau<sup>2</sup>=0.039; Q (df=8)=9.832 ; I<sup>2</sup>=18%; p=0.277  
 Test overall effect Z=0.276; p=0.076

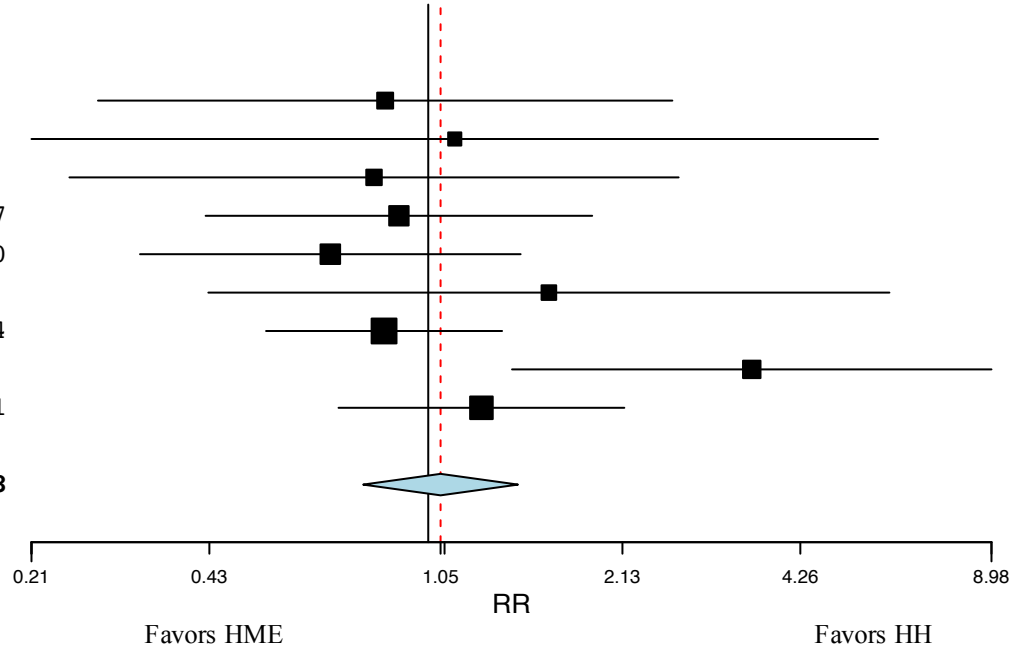

Weight:  
 Dreyfuss: 6.5%,  
 Branson: 3.1%, boots:  
 5.8%, Boots: 19.2%,  
 Diaz: 4.7%, 1.3%,  
 Kollef: 12.7%,  
 Lacherade: 25.3%,  
 Memish: 13.1%,  
 Lorente: 8.9%

## Mortality

| Studies        | Estimate (95% C.I.)         | HME hydrophobic | HH            |
|----------------|-----------------------------|-----------------|---------------|
| Martin 1990    | 0.822 (0.277, 2.438)        | 7/31            | 11/42         |
| Roustan 1992   | 0.681 (0.277, 1.675)        | 10/55           | 15/61         |
| <b>Overall</b> | <b>0.735 (0.368, 1.471)</b> | <b>17/86</b>    | <b>26/103</b> |

Tau<sup>2</sup>=0.000; Q (df=1)=0.068 ; I<sup>2</sup>=0%; p=0.795  
 Test overall effect Z=0.711; p=0.477

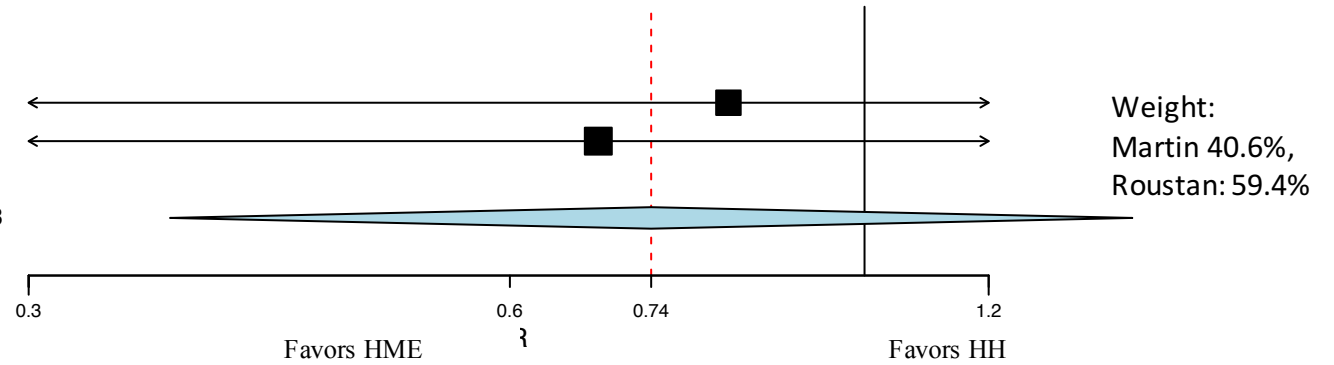

| Studies         | Estimate (95% C.I.)         | HME hydroscopic | HH             |
|-----------------|-----------------------------|-----------------|----------------|
| boots 1997      | 1.542 (0.401, 5.922)        | 6/42            | 4/41           |
| Boots 2006      | 0.943 (0.570, 1.558)        | 37/190          | 39/191         |
| Daud 1991       | 3.261 (0.597, 17.806)       | 6/29            | 2/27           |
| Diaz 2002       | 1.600 (0.424, 6.031)        | 8/23            | 5/20           |
| Dreyfuss 1995   | 1.867 (0.809, 4.310)        | 17/61           | 12/70          |
| Hurni 1997      | 0.788 (0.358, 1.736)        | 17/59           | 19/56          |
| Kirkegaard 1987 | 2.364 (0.361, 15.455)       | 4/15            | 2/15           |
| Kollef 1998     | 0.901 (0.540, 1.502)        | 40/163          | 39/147         |
| Lacherade 2005  | 0.937 (0.609, 1.443)        | 61/186          | 63/184         |
| Memish 2001     | 1.446 (0.826, 2.530)        | 40/123          | 30/120         |
| <b>Overall</b>  | <b>1.092 (0.879, 1.358)</b> | <b>236/891</b>  | <b>215/871</b> |

Tau<sup>2</sup>=0.000; Q (df=9)=7.374 ; I<sup>2</sup>=0%; p=0.598  
 Test overall effect Z=0.505; p=0.445

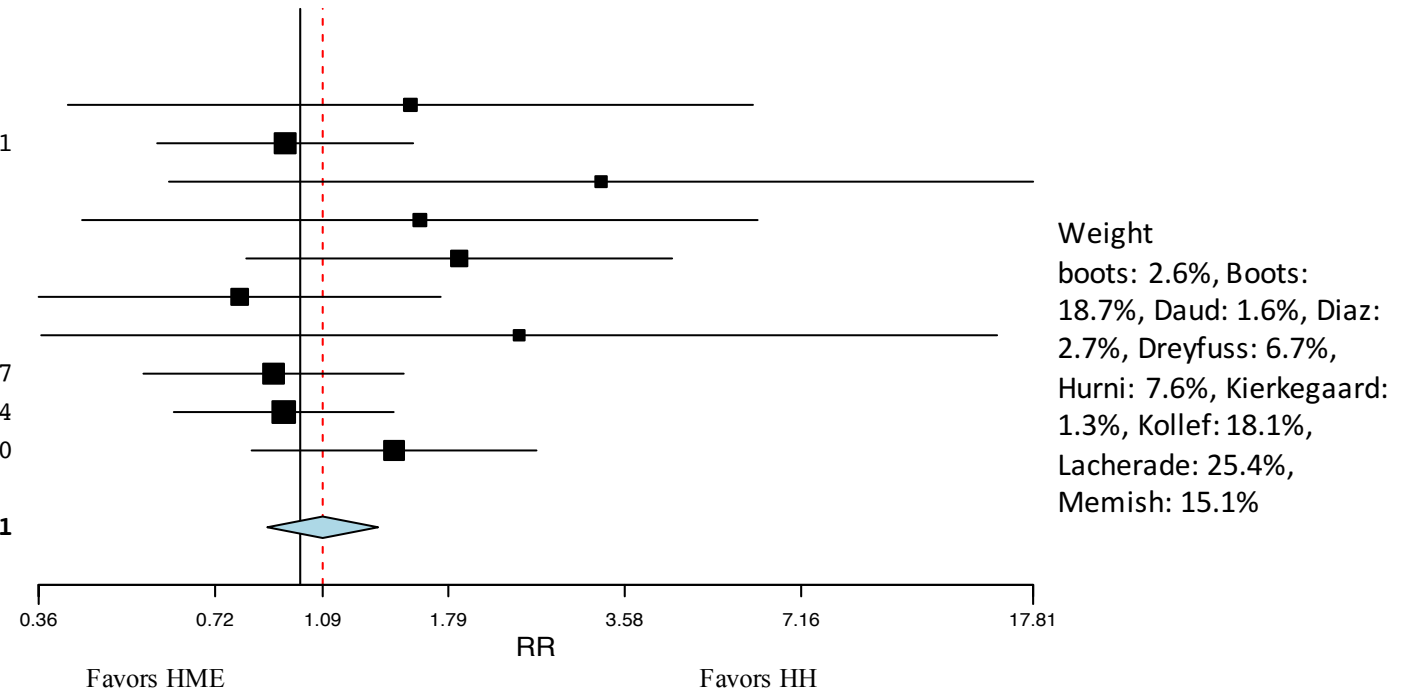

Supplement: 13054_2017_1710_MOESM3_ESM.pdf [file 13054_2017_1710_MOESM3_ESM.pdf]
