# Supplementary material for: Heat and moisture exchangers (HMEs) and heated humidifiers (HHs) in adult critically ill patients: a systematic review, meta-analysis and meta-regression of randomized controlled trials
Source: Springer Nature journal article supplement (doi:10.1186/s13054-017-1710-5), 2017-05-26

## META-REGRESSION FOR ARTIFICIAL AIRWAY OCCLUSION

No significant relationships were found between artificial airway occlusion and ICU LOS, % respiratory diagnoses, SAPS, APACHE II and age.

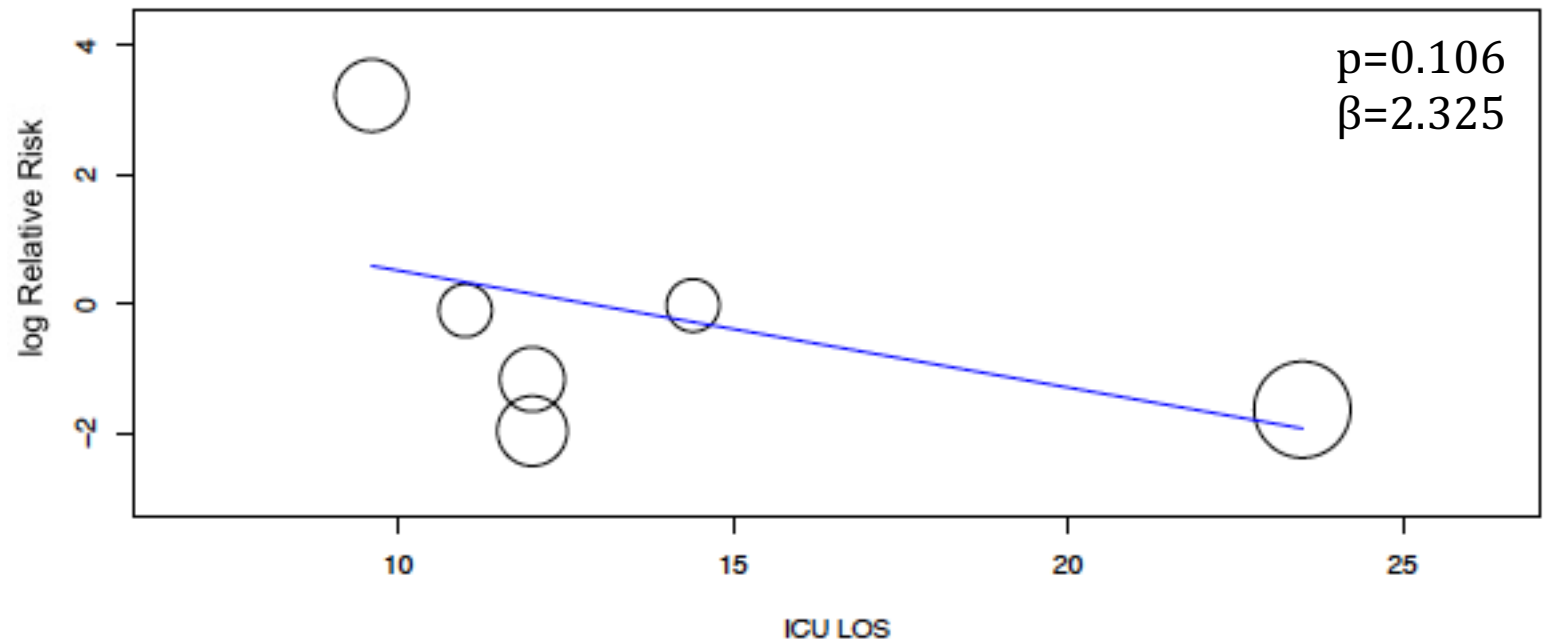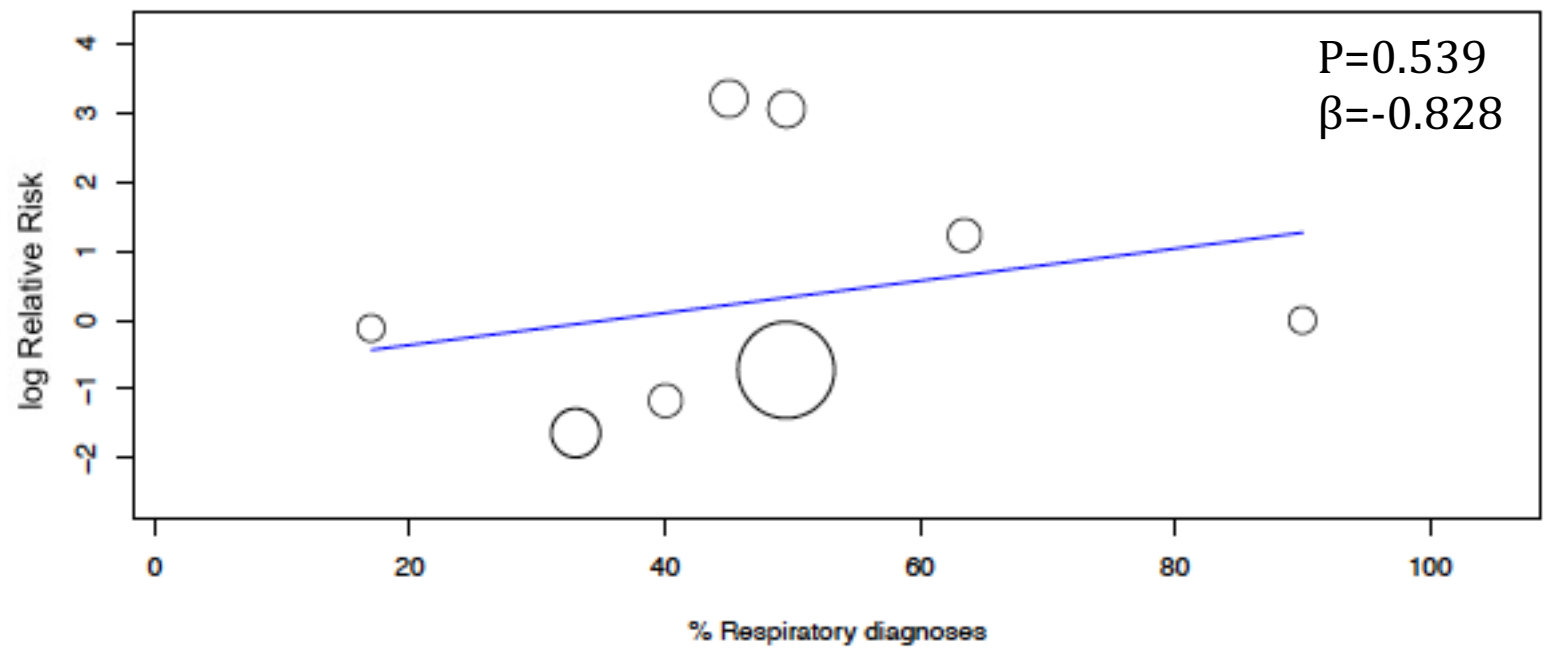

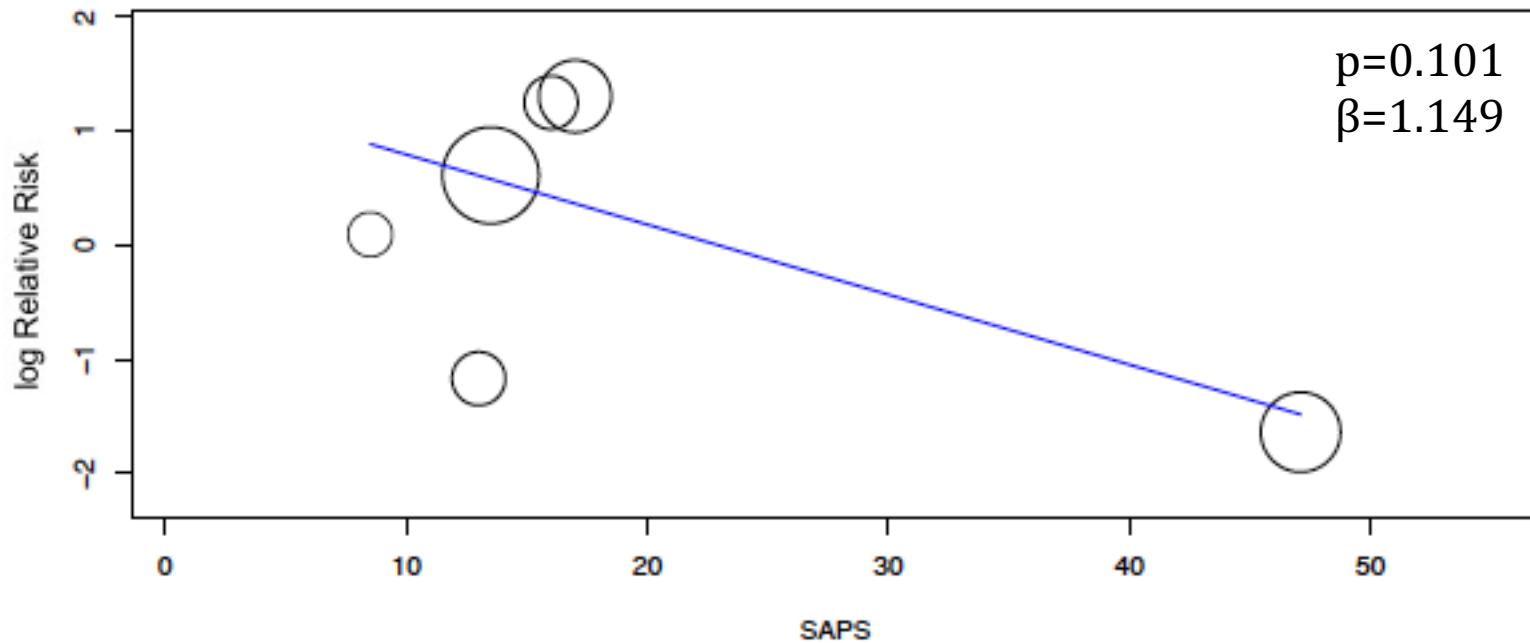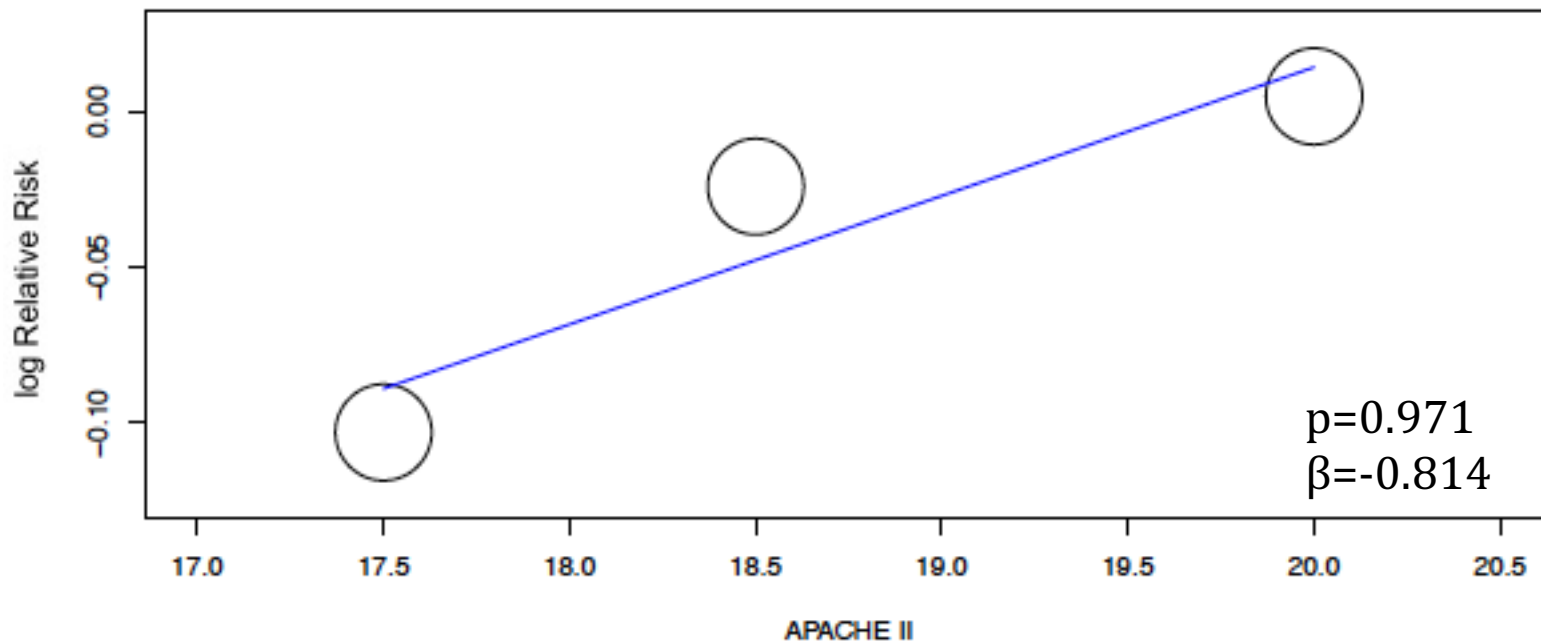

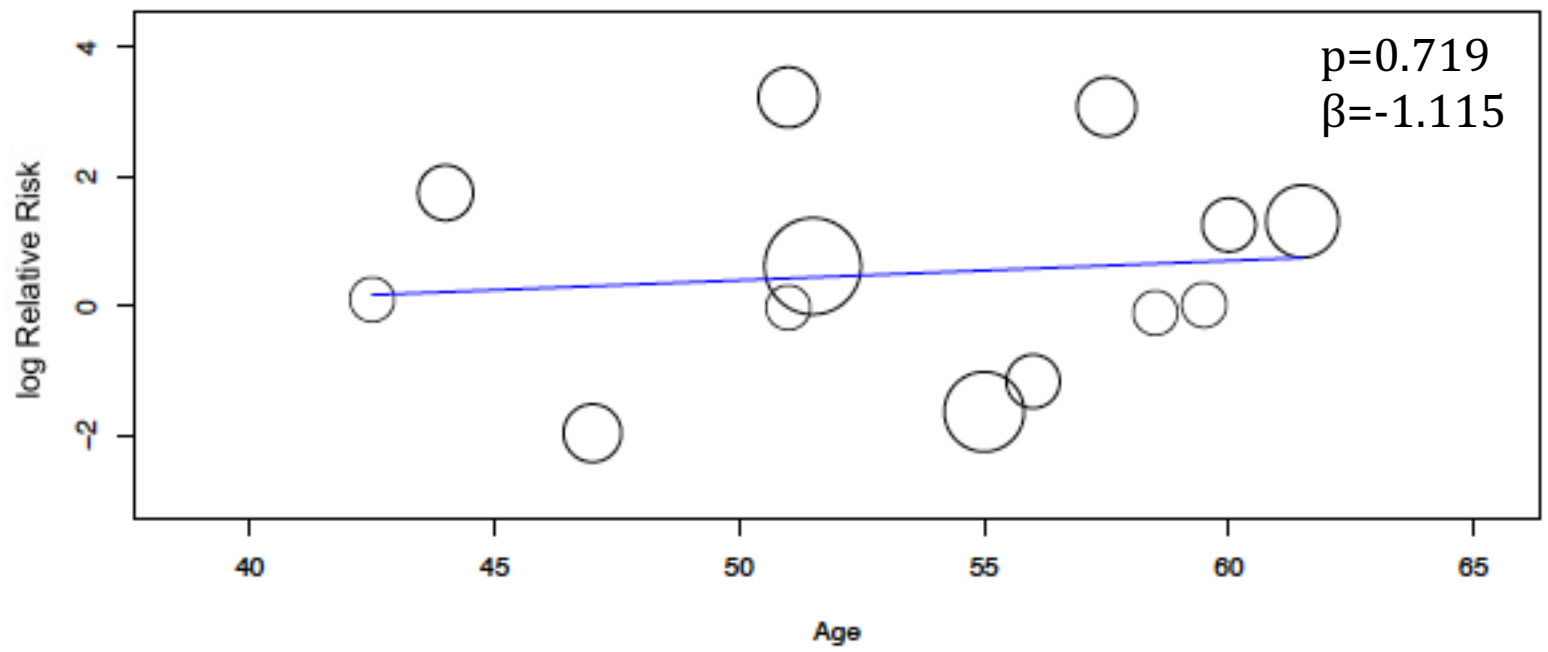

## META-REGRESSION FOR PNEUMONIA

No significant relationships were found between incidence of pneumonia and duration of MV, AIW occlusion/reintubation, ICU LOS, % respiratory diagnoses, SAPS, APACHE II and age.

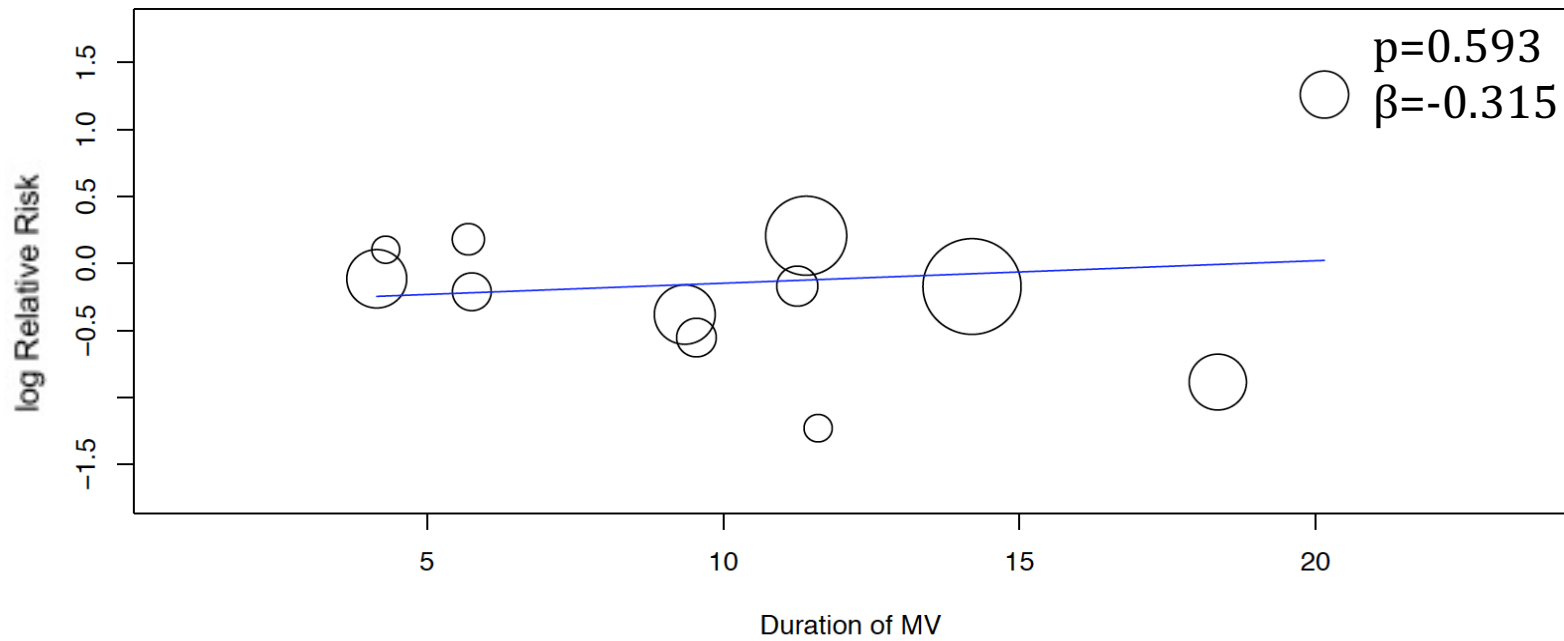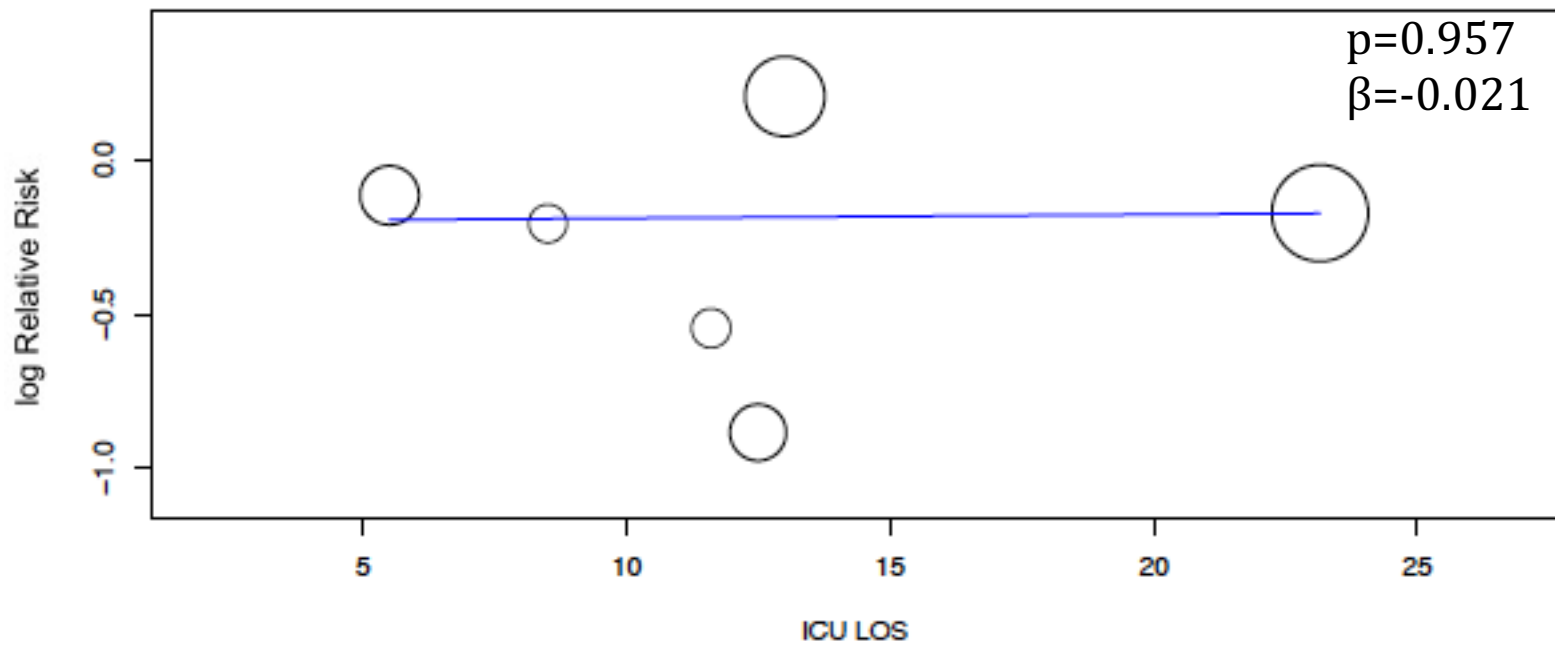

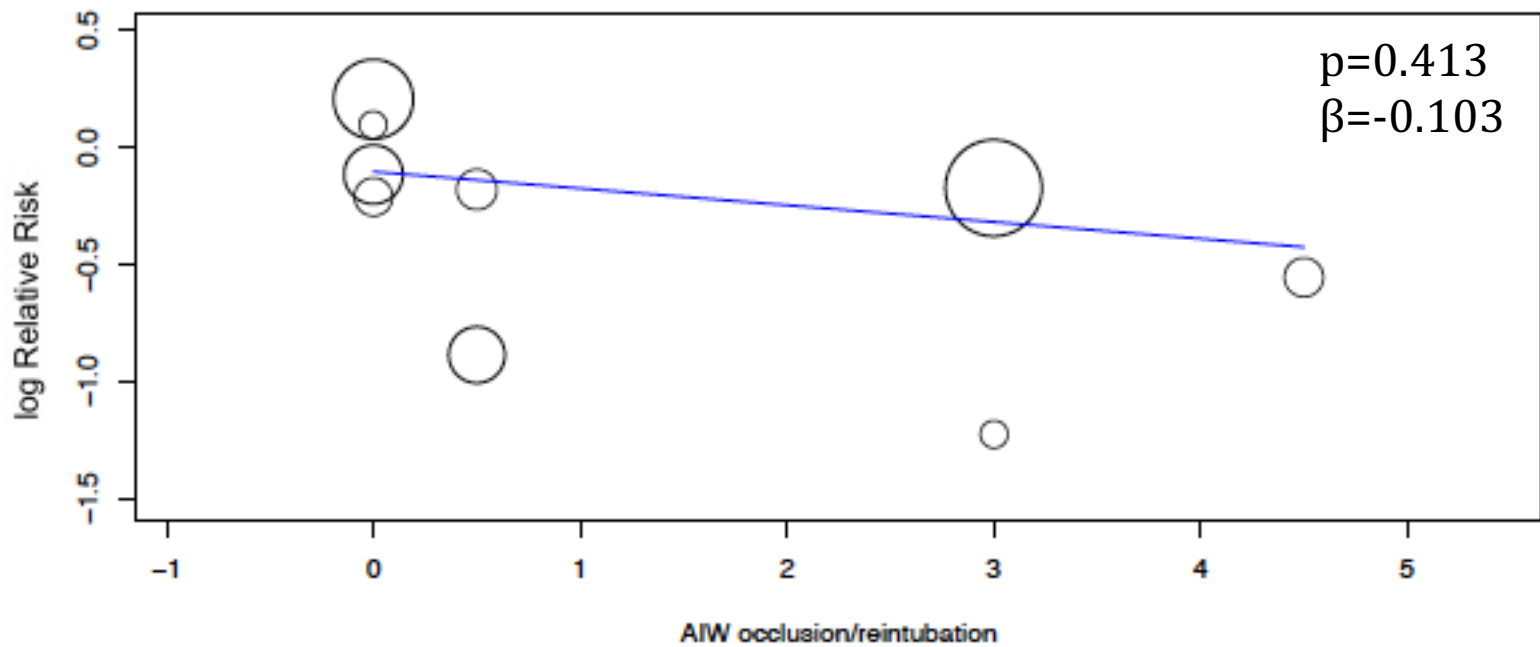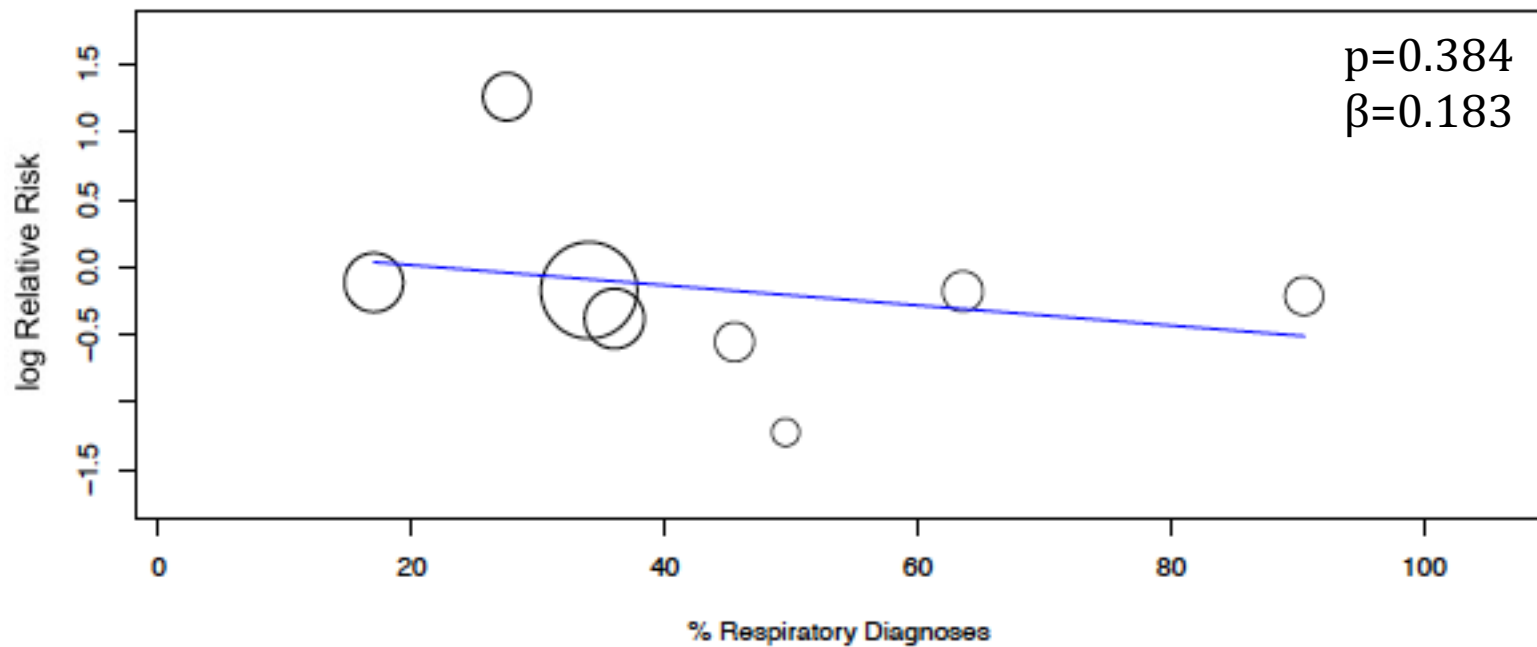

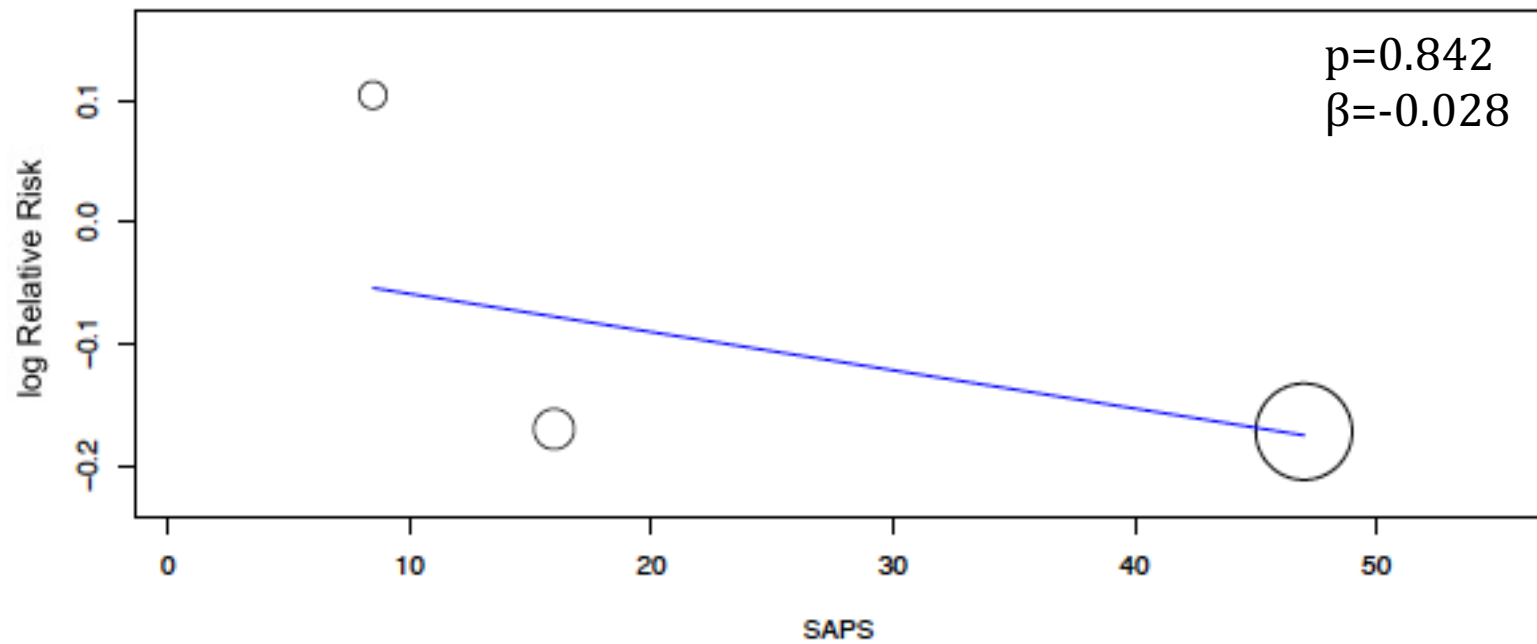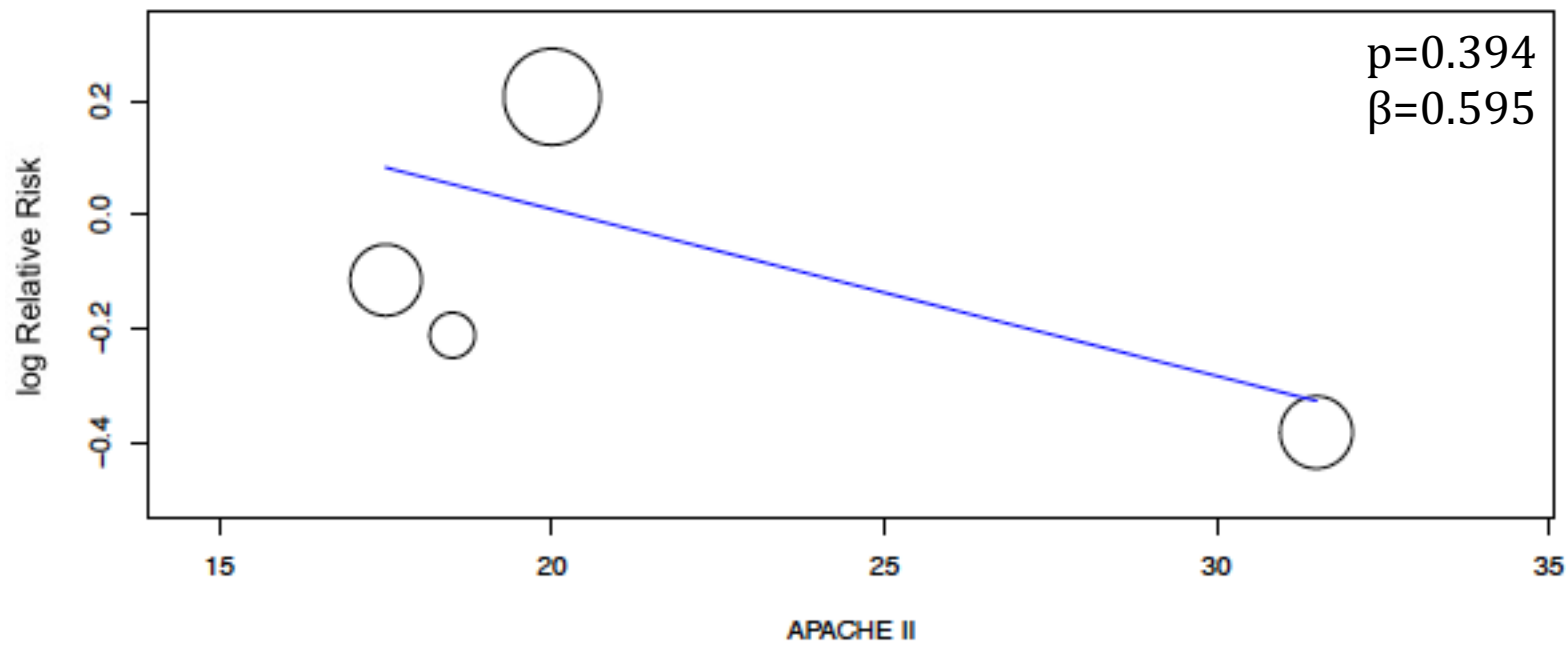



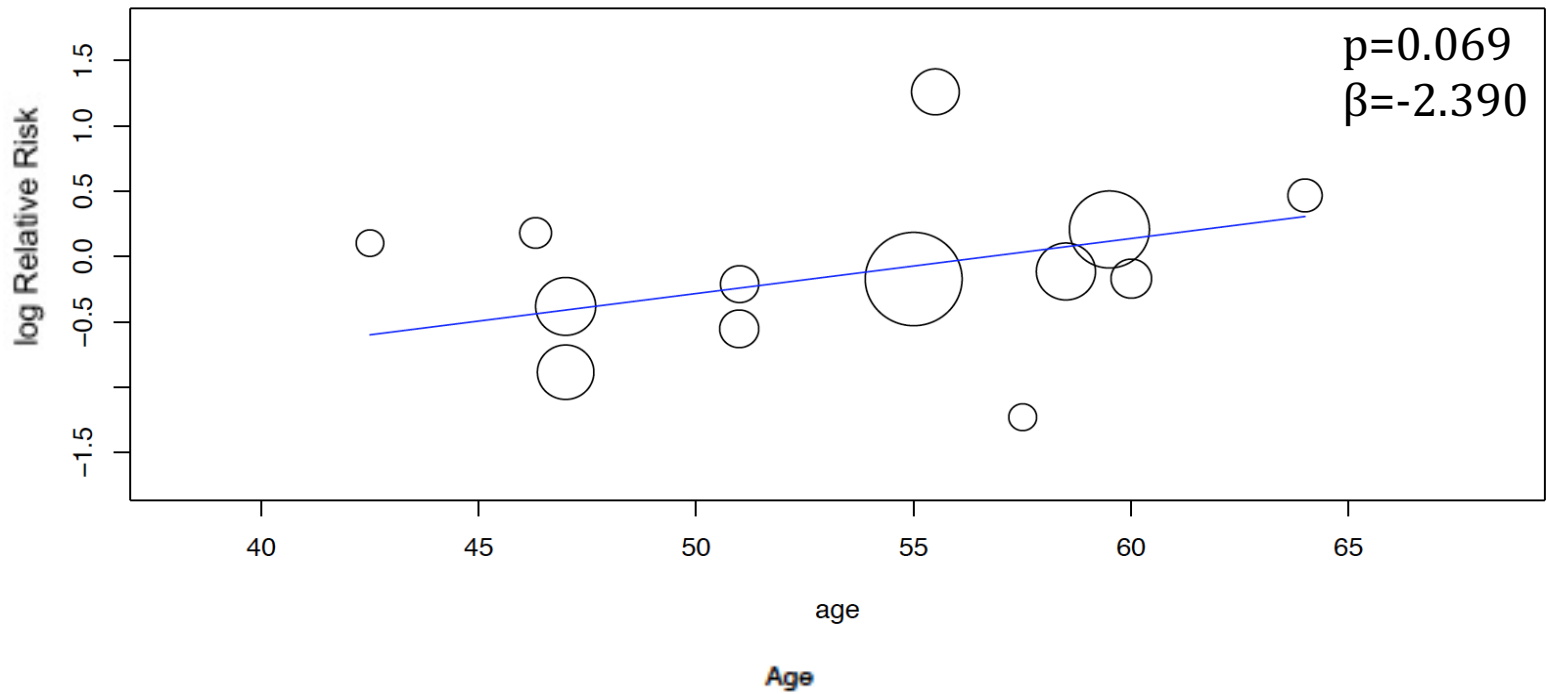

## META-REGRESSION FOR MORTALITY

No significant relationships were found between mortality and duration of MV, VAP incidence, ICU LOS, AIW occlusion/reintubation, % respiratory diagnoses, SAPS, APACHE II and age.

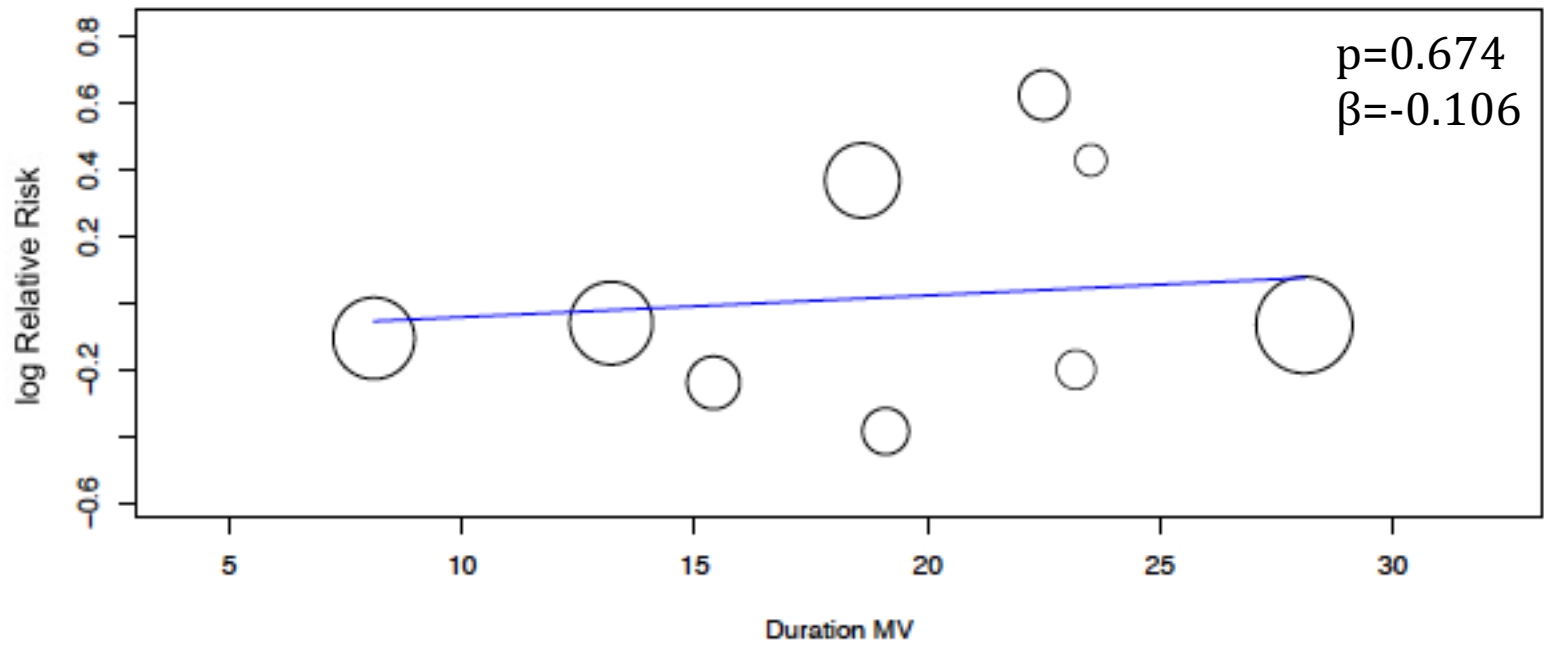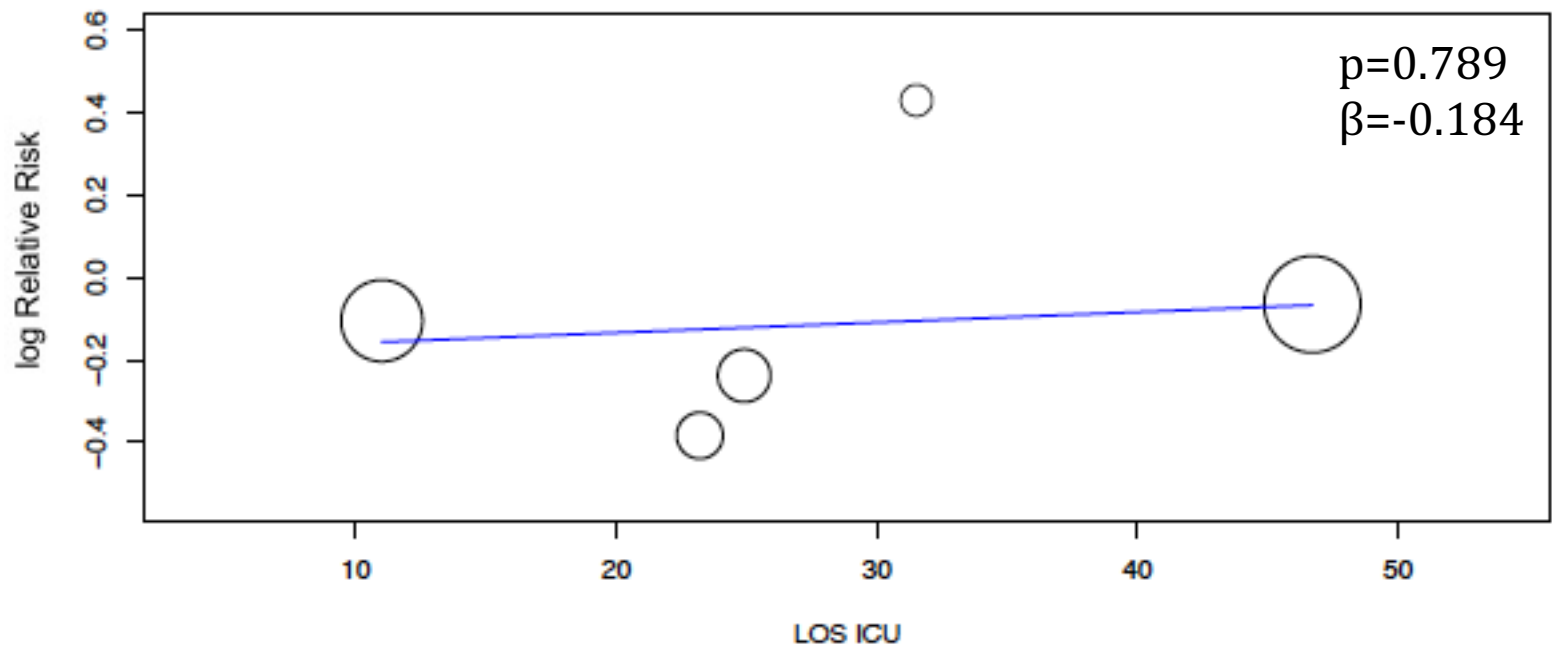

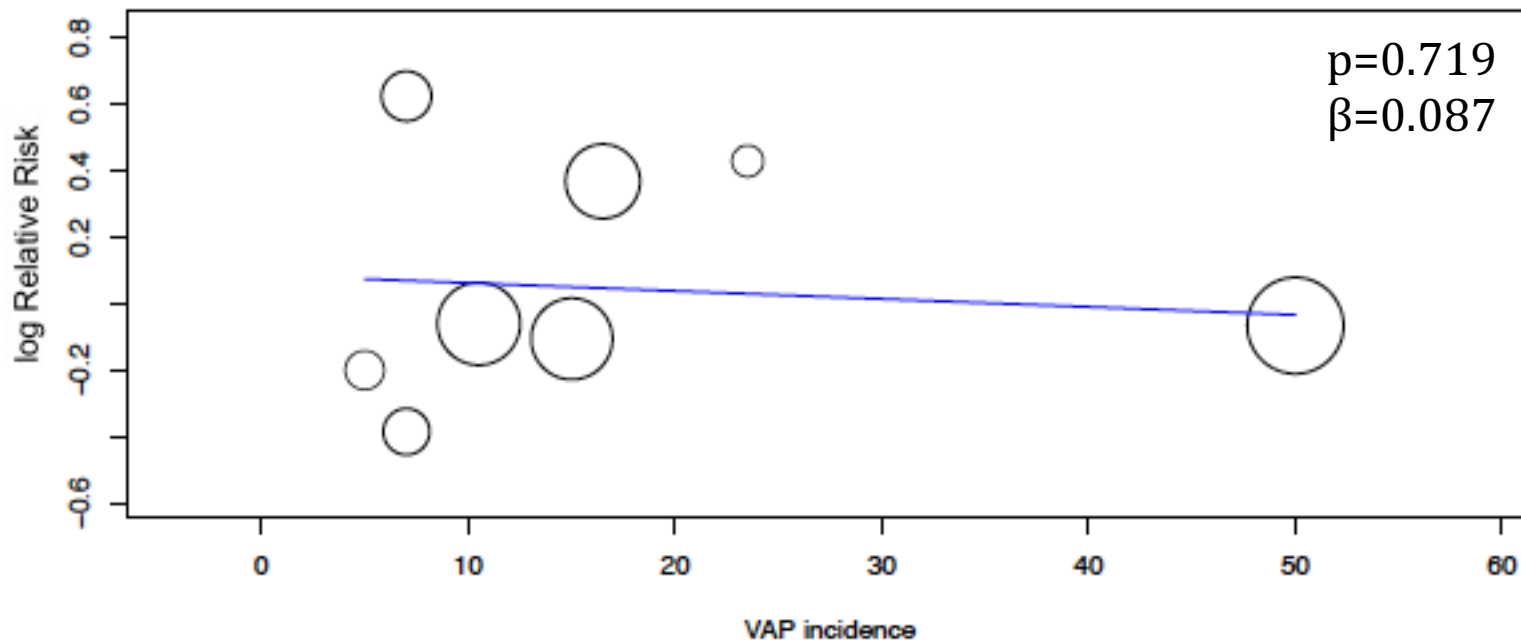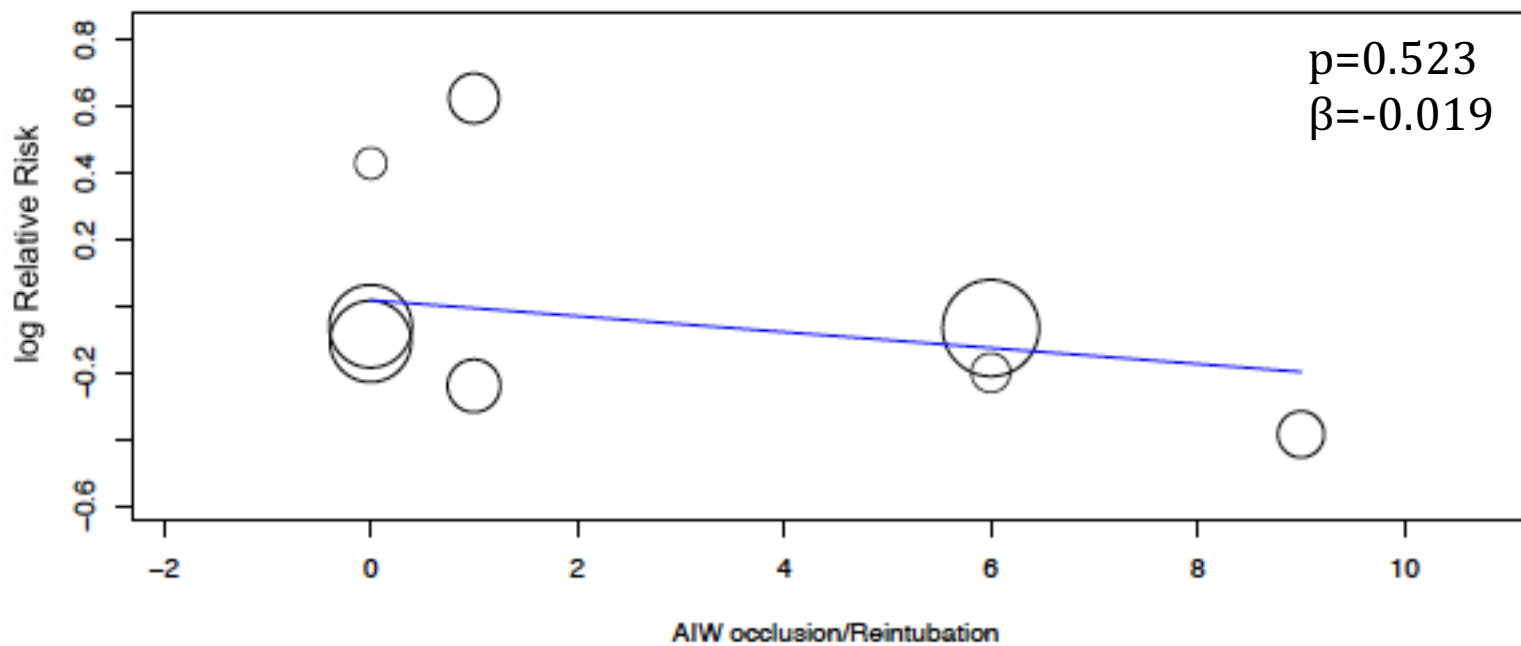

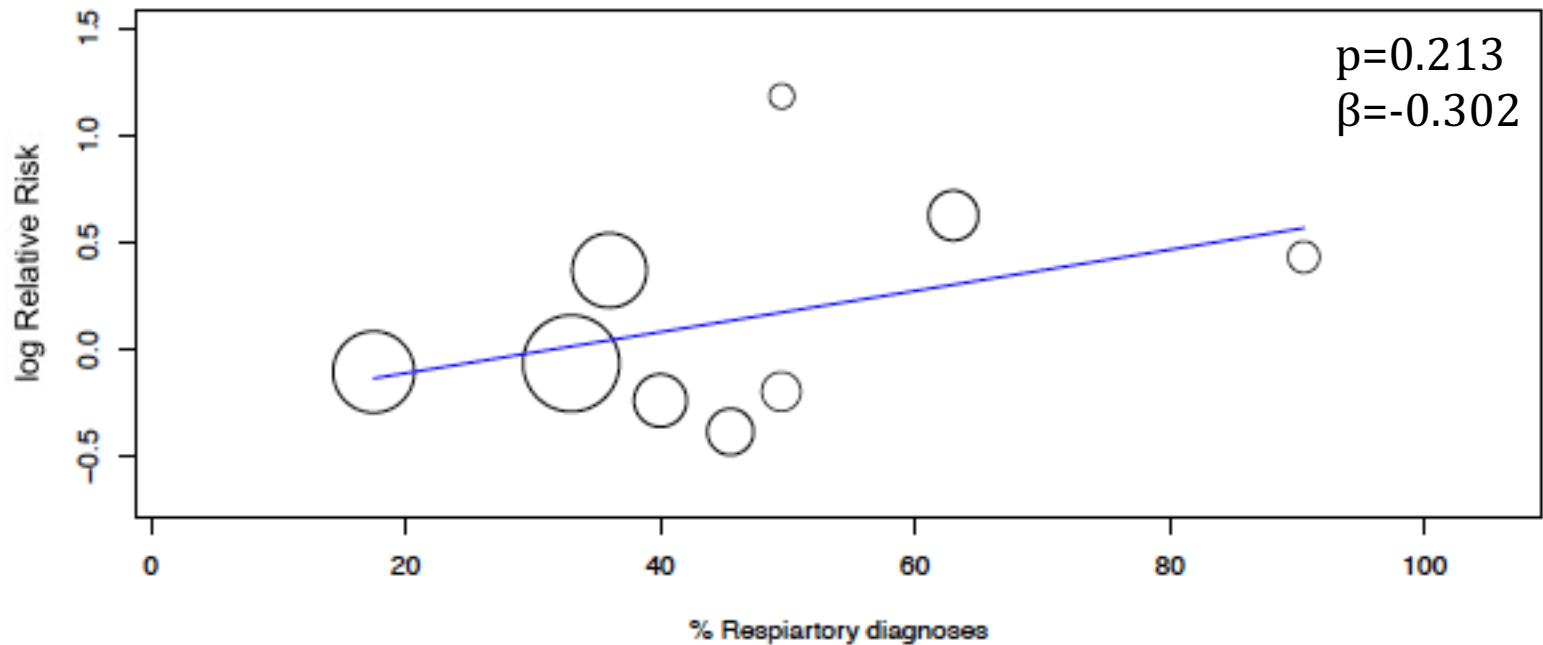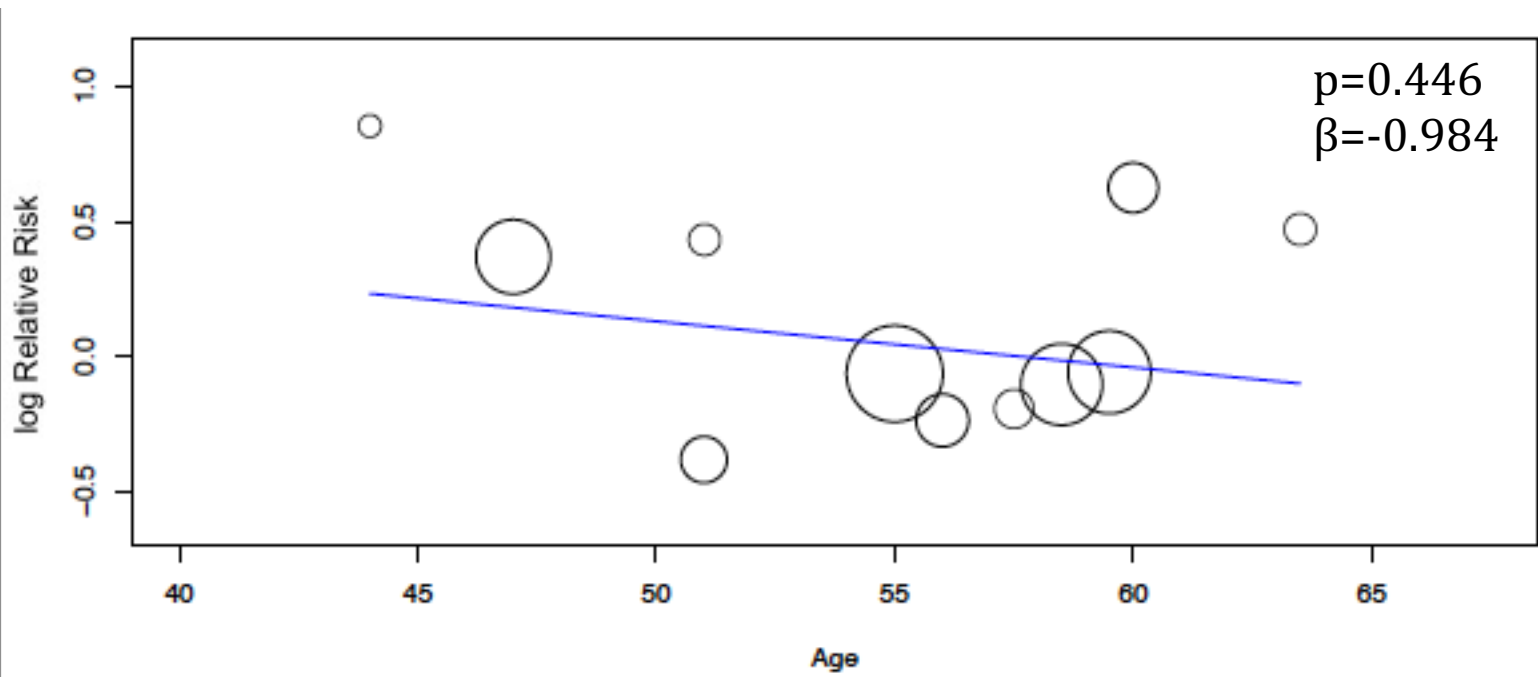

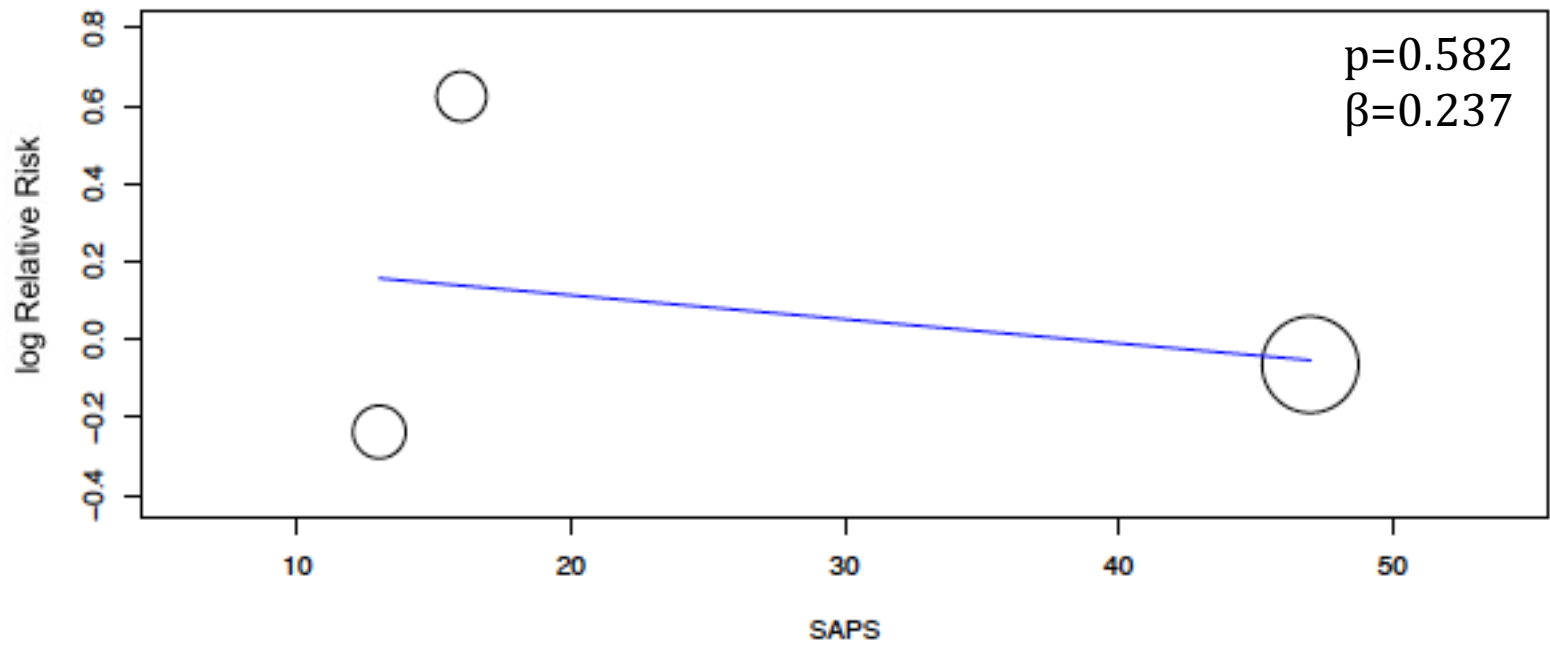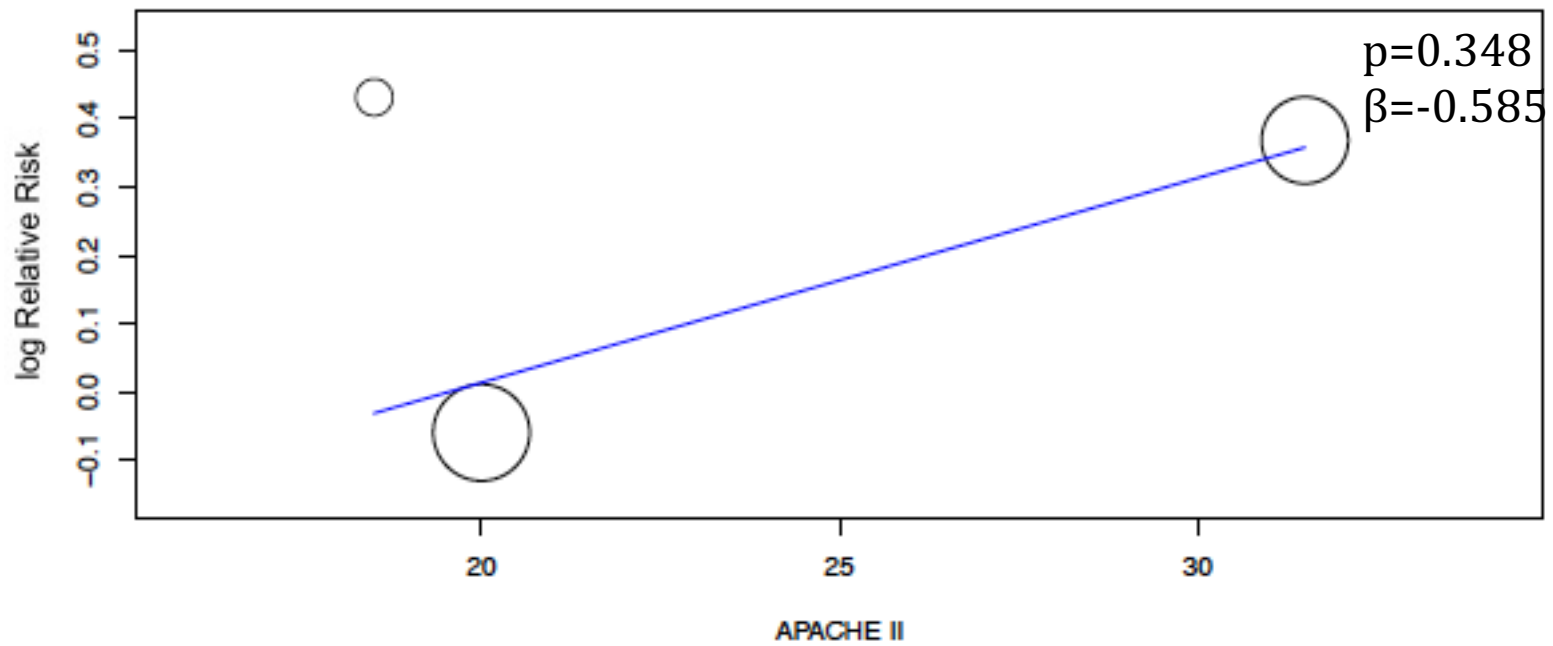

Supplement: MOESM2 [file 12320842]
