# Supplementary material for: Heat and moisture exchangers (HMEs) and heated humidifiers (HHs) in adult critically ill patients: a systematic review, meta-analysis and meta-regression of randomized controlled trials
Source: Springer Nature journal article supplement (doi:10.1186/s13054-017-1710-5), 2017-05-26
Supplement: MOESM1 [file 12320842]

|                | <b>Random sequence generation</b>                                | <b>Allocation concealment</b>                                            | <b>Blinding</b>           | <b>Incomplete outcome data</b> | <b>Baseline characteristics</b>                                                                          |
|----------------|------------------------------------------------------------------|--------------------------------------------------------------------------|---------------------------|--------------------------------|----------------------------------------------------------------------------------------------------------|
| Oguz 2013      | Random number list generated using Excel software<br>L           | Not described<br>U                                                       | Not described<br>U        | Not described<br>U             | Imbalance in baseline characteristic (gender, smoking, chronic disease) and time of circuit changes<br>H |
| Boots 2006     | Predetermined list generated from a list of random numbers.<br>L | Not described<br>U                                                       | Blinding only<br>CXR<br>U | No lost to follow-up<br>L      | Imbalance in baseline characteristics (Length of MV)<br>H                                                |
| Lorente 2006   | Random number list generated using Excel software<br>L           | Not described<br>U                                                       | Not described<br>U        | 16/120 lost to follow-up<br>L  | No imbalance in baseline characteristics<br>L                                                            |
| Lacherade 2005 | Computer generated randomization<br>L                            | Not described<br>U                                                       | Not described<br>U        | No lost to follow-up<br>L      | Imbalance in baseline characteristics (P/F ratio and immunocompromised pts)<br>H                         |
| Diaz 2002      | Random number list<br>L                                          | Sealed and consecutively numbered<br>L                                   | Not described<br>U        | No lost follow up<br>H         | Balance in baseline characteristics<br>L                                                                 |
| Memish 2001    | Group balance was maintained within each block of 20<br>L        | The randomization record was kept with the hospital biostatistician<br>L | Not described<br>U        | 155/398 lost follow up<br>H    | Imbalance in baseline characteristics (neurologic disease)<br>H                                          |
| Kollef 1998    | Not described<br>U                                               | Opaque envelopes<br>L                                                    | Blinding assessment<br>L  | Not described<br>U             | Balance in baseline characteristics<br>L                                                                 |
| Lucchetti 1998 | Not described<br>U                                               | Not described<br>U                                                       | Not described<br>U        | Not described<br>U             | Not described<br>U                                                                                       |

|                |                                                                                                                                                                                                                           |                                                    |                                                                  |                                 |                                                                            |
|----------------|---------------------------------------------------------------------------------------------------------------------------------------------------------------------------------------------------------------------------|----------------------------------------------------|------------------------------------------------------------------|---------------------------------|----------------------------------------------------------------------------|
| Boots 1997     | Not described<br>U                                                                                                                                                                                                        | Not described<br>U                                 | Not described<br>U                                               | No lost to follow-up<br>L       | Balance in baseline characteristics<br>L                                   |
| Hurni 1997     | Not described<br>U                                                                                                                                                                                                        | Not described<br>U                                 | Not described<br>U                                               | 50% lost to follow-up<br>H      | Imbalance in baseline characteristic(age) and time of circuit changes<br>H |
| Kirton 1997    | Randomization was by a random number generated from a personal computer<br>L                                                                                                                                              | Not described<br>U                                 | Laboratory and chest radiograph interpretation were blinded<br>L | 6/280 lost to follow up<br>L    | Not described<br>U                                                         |
| Dreyfuss 1995  | Not described<br>U                                                                                                                                                                                                        | Not described<br>U                                 | Not described<br>U                                               | 36/164 lost to follow up<br>L   | Balance in baseline characteristics<br>L                                   |
| Branson 1996   | Randomization was accomplished using the last digit in the patient's medical record number --- patients with an odd medical record number received an HCH and those with an even number received a heated humidifier<br>H | Randomization was accomplished at the Bedside<br>H | Not described<br>U                                               | Number enrolled not stated<br>U | Balance in baseline characteristics<br>L                                   |
| Villafane 1996 | Not described<br>U                                                                                                                                                                                                        | Not described<br>U                                 | Not described<br>U                                               | Not described<br>U              | Not described<br>U                                                         |
| Rouston 1992   | Not described<br>U                                                                                                                                                                                                        | Not described<br>U                                 | Not described<br>U                                               | 100% follow up<br>L             | Balance in baseline characteristics<br>L                                   |
| Misset 1991    | Not described<br>U                                                                                                                                                                                                        | Not described<br>U                                 | Not described<br>U                                               | 18/74 lost to follow up<br>L    | Balance in baseline characteristics<br>L                                   |

|                    |                    |                    |                    |                              |                                             |
|--------------------|--------------------|--------------------|--------------------|------------------------------|---------------------------------------------|
| Martin<br>1990     | Not described<br>U | Not described<br>U | Not described<br>U | No lost to<br>follow-up<br>L | Balance in baseline<br>characteristics<br>L |
| Kirkegaard<br>1997 | Not described<br>U | Not described<br>U | Not described<br>U | No lost to<br>follow-up<br>L | Balance in baseline<br>characteristics<br>L |

Table 2: description of quality assessment for each included study.  
H= high risk of bias; L= low risk of bias; U= uncertain risk of bias,
